# Supplementary figures and images for: Randomized Controlled Trial of Contingency Management for Stimulant Use in Community Mental Health Patients With Serious Mental Illness
Source: Atypon-hosted journal article supplement (doi:10.1176/appi.ajp.2012.11121831), 2013-01-01

FIGURE 1. Study CONSORT Diagram

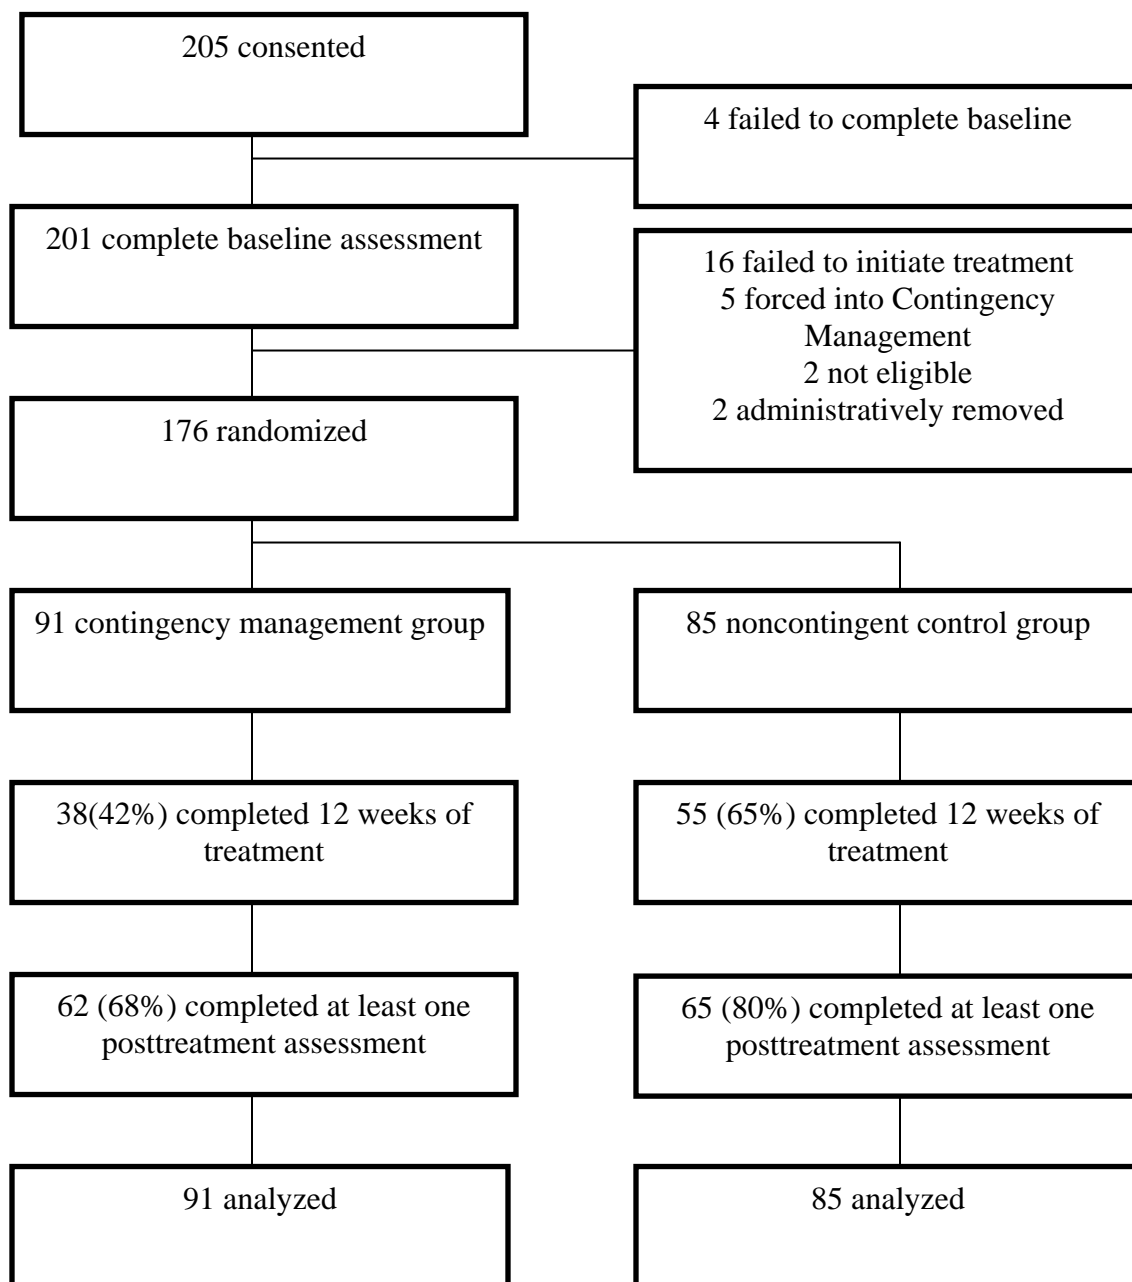

Supplement: 94_ds001.pdf [file 94_ds001.pdf]
